# Supplementary material for: Analysis of SUMO1-conjugation at synapses
Source: eLife journal article supplement (doi:10.7554/elife.26338), 2017-06-09
Supplement: supp [file elife-26338-supp-v1.zip]

Archive with 2 entries (2 files):
- elife_poa_e26338_Figure_1_Figure_Supplement_1.pdf
- elife_poa_e26338_Figure_1_Figure_Supplement_2.ai
