# Supplementary figures and images for: Analysis of SUMO1-conjugation at synapses
Source: eLife journal article supplement (doi:10.7554/elife.26338), 2017-06-09

Figure 1 - Figure Supplement 1

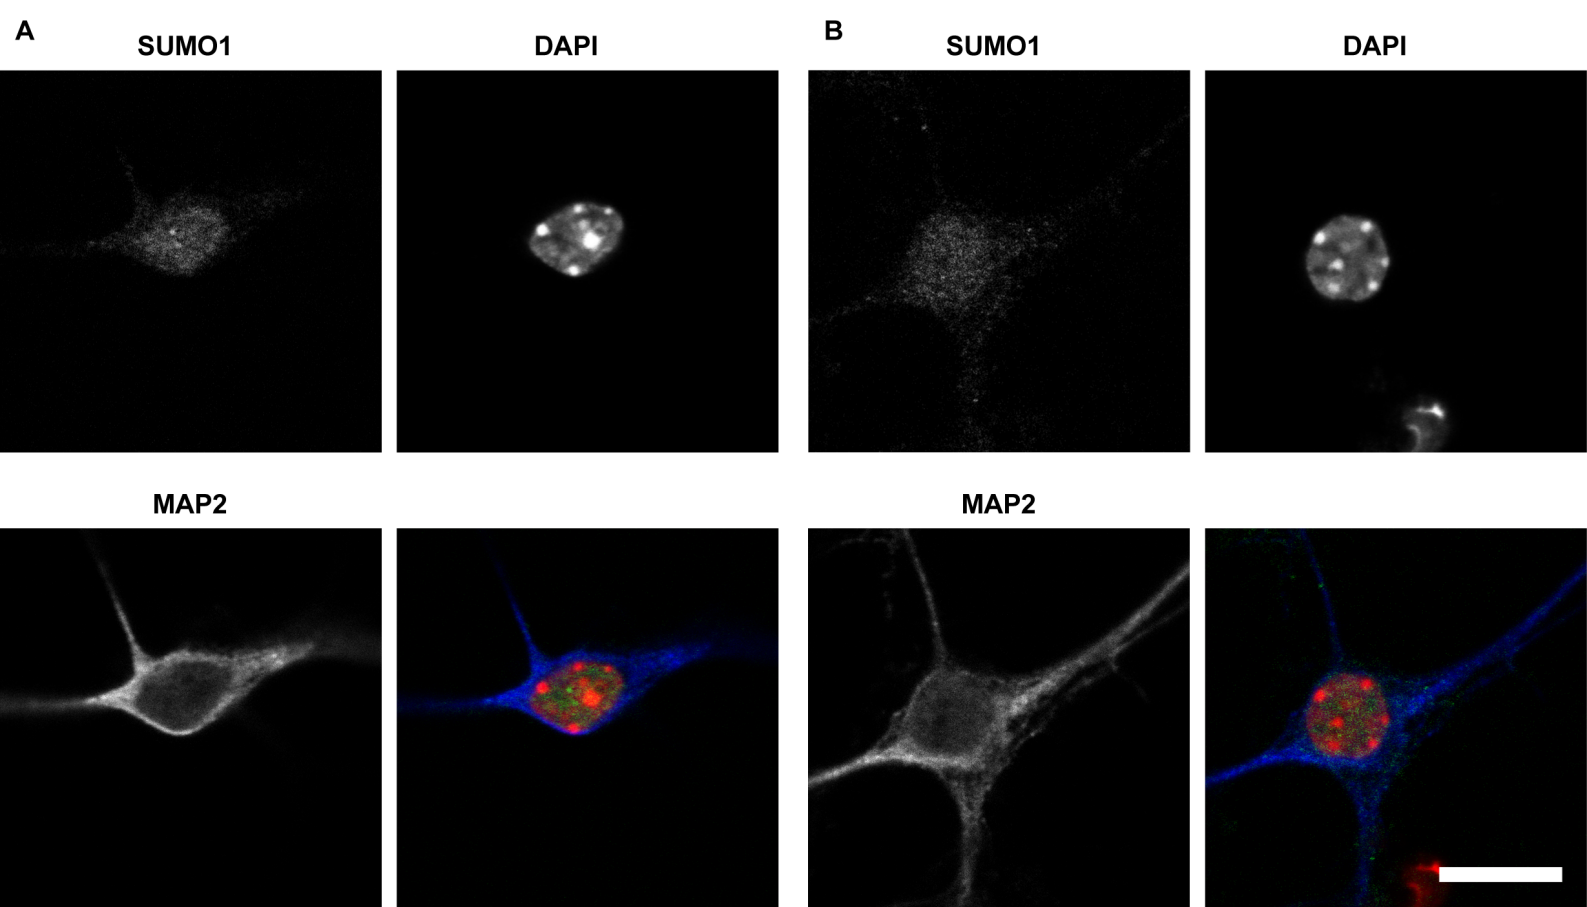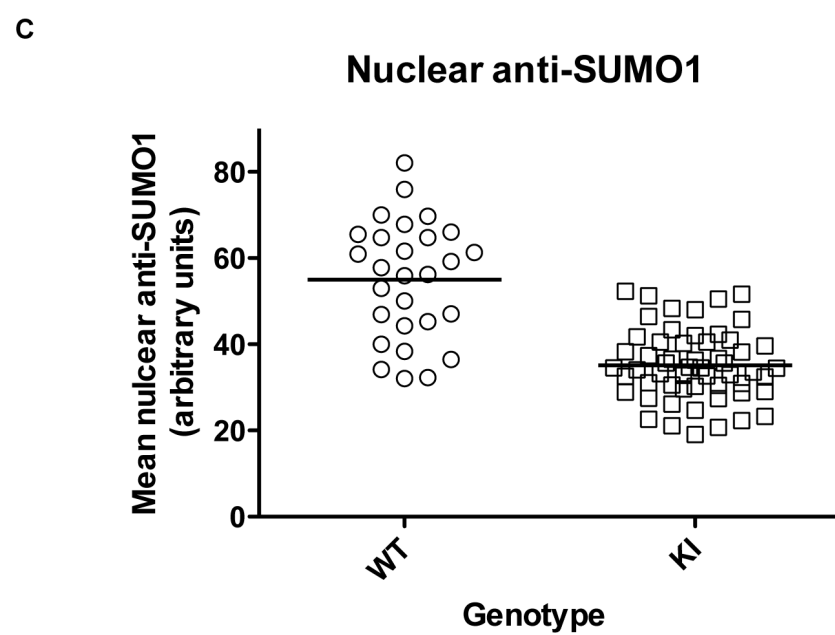

Supplement: supp [file elife-26338-supp-v1.zip › elife_poa_e26338_Figure_1_Figure_Supplement_1.pdf]
